# Supplementary material
Source: bioRxiv or medRxiv preprint supplement (https://www.biorxiv.org/highwire/filestream/36702/field_highwire_adjunct_files/6/125211-2.pdf)

1 2,000 4,000 6,000 8,000 10,000 12,000 14,480

Sanger Primers

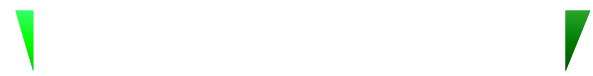

Identity

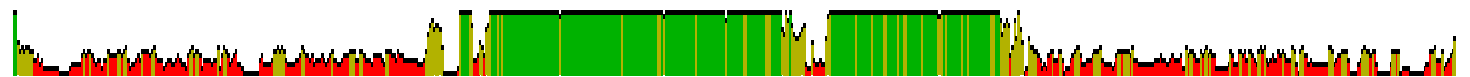

5S  
23S  
16S

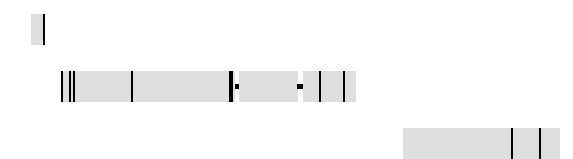

Klebsiella rRNA  
assemblies,  
PCR Primers

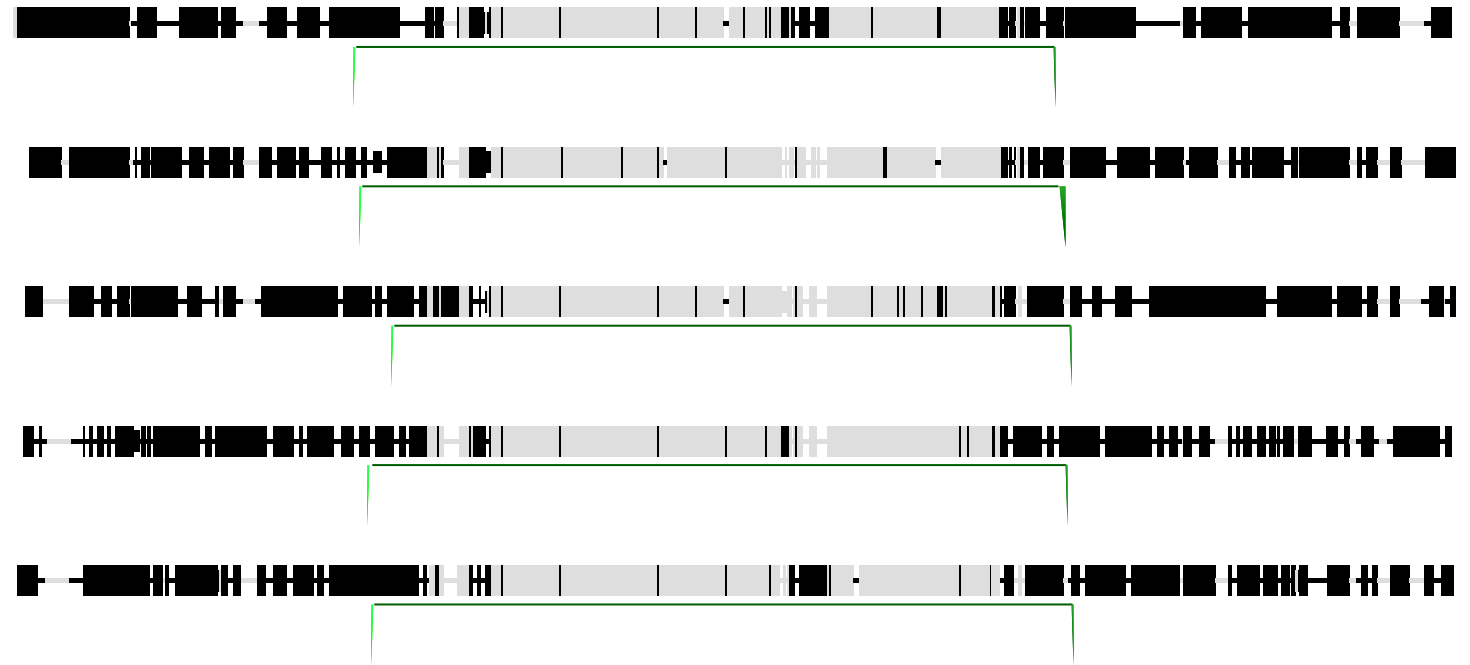

Supplement: Supplementary file [file 125211-2.pdf]
